# Supplementary material for: circMSH3 is a potential biomarker for the diagnosis of colorectal cancer and affects the distant metastasis of colorectal cancer
Source: PeerJ. 2023 Nov 7;11:e16297. doi: 10.7717/peerj.16297 (PMC10637257; doi:10.7717/peerj.16297)
Supplement: Supplemental Information 1 — 10 pairs of colorectal cancer patients compared between groups, differentially expressed circRNAs. [file peerj-11-16297-s001.xlsx]

## Sheet: Metastasis-noMetastasis_diff
circbaseID

## Sheet: Metastasis-norm_Metastasis_diff
circbaseID

## Sheet: nomet-norm_nomet_diff
circbaseID
